# Supplementary material for: Halide Ion-Templated Atomic Precision Synthesis and Structural Modulation of Silver Sulfide Nanoclusters
Source: Research Square preprint supplement (doi:10.21203/rs.3.rs-6046680/v1), 2025-02-21
Supplement: Supplementary file 1 [file 289bcf34bd5d5f4785d781e9.docx]

**Supporting information for**

**Halide Ion-Templated Atomic Precision Synthesis and Structural Modulation of Silver Sulfide Nanoclusters**

Juefei Dai,‡a Chuanhua Shi,‡a Zhixun Zhang,‡a Yan Nong,a Chenchen Feng,a Xianyong Yu,b Chao Yang,a Xueji Zhang*a & Huayan Yang*a

aShenzhen Key Laboratory of Nano-Biosensing Technology，Shenzhen University Medical School，Shenzhen University，Shenzhen 518060, China,

bKey Laboratory of Theoretical Organic Chemistry and Functional Molecules, Ministry of Education, Hunan University of Science and Technology, Xiangtan 411100, China,

‡These authors contributed to this work equally.

Corresponding authors: E-mail addresses: yanghuayan@szu.edu.cn (Prof. Huayan Yang); zhangxueji@szu.edu.cn (Professor Xueji Zhang)

**Experimental Details**

**Reagents:** Silver nitrate (AgNO3, 99%), Purchase from Xilong Scientific; 4-tert-Butylbenzenethiol (HSC6H4***t***Bu, 97%), Tetramethylammonium Bromide (NMe4Br, 98%), Tetramethyl Ammonium Chloride (NMe4Cl, 98%), Tetrabutylammonium Chloride (NEt4Cl, 99%), Tetrabutylammonium Bromide (NEt4Br, 98%) purchase from Adamas Pharmaceuticals, Inc; deionized water (H2O, homemade); All reagents without further processing, use directly.

**Instruments:** The X-ray single crystal diffractometer used was Brooke D8 VENTURE X-ray single crystal diffractometer.

**Synthesis of** Ag**SC6H4*t*Bu:** Weigh 4 g AgNO3 in a 250 mL flask and add 100 mL of water to dissolve. A 20 mL ethanol solution of 3.93 g HSC6H4***t***Bu was added to the silver nitrate solution with rapid stirring under nitrogen atmosphere. to the silver nitrate solution under rapid stirring, and immediately precipitated a large amount of yellow solid. Filter and rinse three times with water, ethanol and ether. The white solid was dried under vacuum overnight, and then crushed in a fume hood. Crushed in a fume hood. 5.78 g AgSC6H4tBu powder was obtained with 90% yield.

**Synthesis of [Br2@[Ag28(SC6H4*t*Bu)28(Br)2]:** In a clean 10 mL screw-necked bottle, 20 mg of AgSC6H4***t***Bu and 15 mg of NMe4Br were weighed accurately, and acetonitrile (5 mL) with the addition of deionized water (80 μL) were added. The resulting solution was magnetically stirred at ambient temperature (25°C) for 30 minutes under atmospheric conditions, followed by thermal treatment in a preheated oven maintained at 60°C for 24 hours. Solid-liquid separation of the yellow solution and the white solid in the glass vials was then carried out using a filtering device with appropriate filtration precision (e.g. filter paper with appropriate pore size and a Brinell funnel). The filtrate was collected, transferred to a clean, light-proof container and stored at room temperature in a dark place with stable environmental conditions to allow it to slowly evaporate and crystallize. After 3 weeks, yellow block crystals were precipitated.

**Synthesis of [****Cl@Ag36(SC6H4*t*Bu)36]:** In a clean 10 mL screw-necked bottle, 20 mg of AgSC6H4***t***Bu and 5 mg of NMe4Cl were weighed accurately, and acetonitrile (5 mL) with the addition of deionized water (80 μL) were added. The resulting solution was magnetically stirred at ambient temperature (25°C) for 30 minutes under atmospheric conditions, followed by thermal treatment in a preheated oven maintained at 60°C for 24 hours. Solid-liquid separation of the yellow solution and the white solid in the glass vials was then carried out using a filtering device with appropriate filtration precision (e.g. filter paper with appropriate pore size and a Brinell funnel). The filtrate was collected, transferred to a clean, light-proof container and stored at room temperature in a dark place with stable environmental conditions to allow it to slowly evaporate and crystallize. After 3 weeks, yellow block crystals were precipitated.

**Synthesis of [Br2@Ag28(SC6H4*t*Bu)30]:** In a clean 10 mL screw-necked bottle, 20 mg of AgSC6H4***t***Bu and 15 mg of NMe4Br were weighed accurately, and acetonitrile: acetone =2:1 (6 mL) with the addition of deionized water (100 μL) were added. The resulting solution was magnetically stirred at ambient temperature (25°C) for 30 minutes under atmospheric conditions, followed by thermal treatment in a preheated oven maintained at 60°C for 24 hours. Solid-liquid separation of the yellow solution and the white solid in the glass vials was then carried out using a filtering device with appropriate filtration precision (e.g. filter paper with appropriate pore size and a Brinell funnel). The filtrate was collected, transferred to a clean, light-proof container and stored at room temperature in a dark place with stable environmental conditions to allow it to slowly evaporate and crystallize. After 1-week, yellow rod-shaped crystals were precipitated.

**Synthesis of [****Cl2@Ag28(SC6H4*t*Bu)30]:** In a clean 10 mL screw-necked bottle, 20 mg of AgSC6H4***t***Bu and 15 mg of NMe4Cl were weighed accurately, and acetonitrile: acetone =2:1 (6 mL) with the addition of deionized water (100 μL) were added. The resulting solution was magnetically stirred at ambient temperature (25°C) for 30 minutes under atmospheric conditions, followed by thermal treatment in a preheated oven maintained at 60°C for 24 hours. Solid-liquid separation of the yellow solution and the white solid in the glass vials was then carried out using a filtering device with appropriate filtration precision (e.g. filter paper with appropriate pore size and a Brinell funnel). The filtrate was collected, transferred to a clean, light-proof container and stored at room temperature in a dark place with stable environmental conditions to allow it to slowly evaporate and crystallize. After 1-week, yellow rod-shaped crystals were precipitated.

**Synthesis of [Ag23(SC6H4*t*Bu)26] ·3(NBu4):** In a clean 10 mL screw-necked bottle, 20 mg of AgSC6H4***t***Bu and 5 mg of NBu4Cl were weighed accurately, and acetone (5 mL) with the addition of deionized water (80 μL) were added. The resulting solution was magnetically stirred at ambient temperature (25°C) for 30 minutes under atmospheric conditions, followed by thermal treatment in a preheated oven maintained at 60°C for 24 hours. Solid-liquid separation of the yellow solution and the white solid in the glass vials was then carried out using a filtering device with appropriate filtration precision (e.g. filter paper with appropriate pore size and a Brinell funnel). The filtrate was collected, transferred to a clean, light-proof container and stored at room temperature in a dark place with stable environmental conditions to allow it to slowly evaporate and crystallize. After 1-week, yellow rod-shaped crystals were precipitated.

**Synthesis of [****Cl@Ag23(SC6H4*t*Bu)24] ·(NBu4):** In a clean 10 mL screw-necked bottle, 20 mg of AgSC6H4***t***Bu and 15 mg of NBu4Cl were weighed accurately, and acetone (5 mL) with the addition of deionized water (80 μL) were added. The resulting solution was magnetically stirred at ambient temperature (25°C) for 30 minutes under atmospheric conditions, followed by thermal treatment in a preheated oven maintained at 60°C for 24 hours. Solid-liquid separation of the yellow solution and the white solid in the glass vials was then carried out using a filtering device with appropriate filtration precision (e.g. filter paper with appropriate pore size and a Brinell funnel). The filtrate was collected, transferred to a clean, light-proof container and stored at room temperature in a dark place with stable environmental conditions to allow it to slowly evaporate and crystallize. After 1-week, yellow block crystals were precipitated.


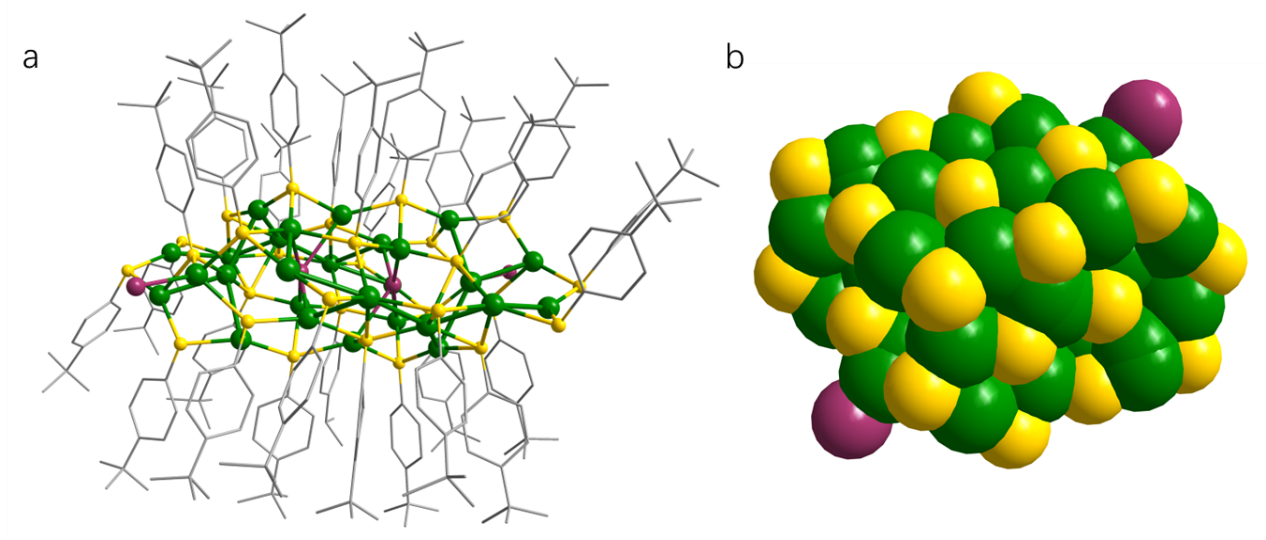


**Fig.S1** The standard and Space-Filling model of the crystal structure of Br2@Ag28Br2. Color code: green, Ag; yellow, S; gray, C; plum, Br


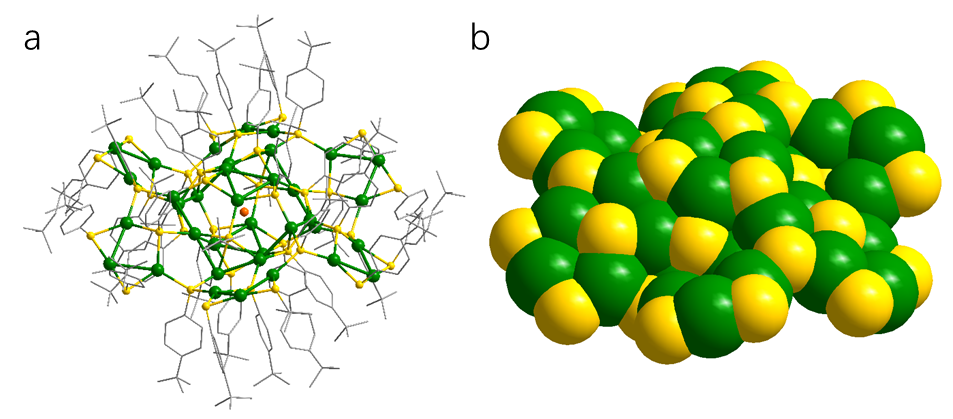


**Fig.S2** The standard and Space-Filling model of the crystal structure of Cl@Ag36. Color code: green, Ag; yellow, S; gray, C; orange, Cl


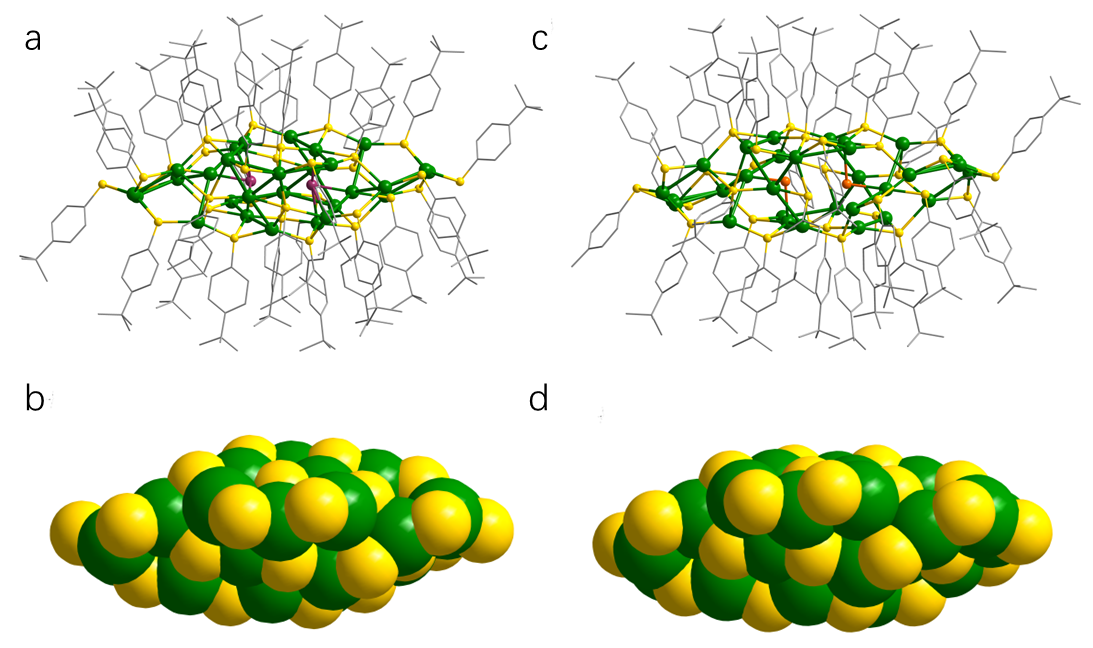
**Fig.S3** （a, b）The standard and Space-Filling model of the crystal structure of Br2@Ag28; (c, d) The standard and Space-Filling model of the crystal structure of Cl2@Ag28. Color code: green, Ag; yellow, S; gray, C; plum, Br; orange, Cl


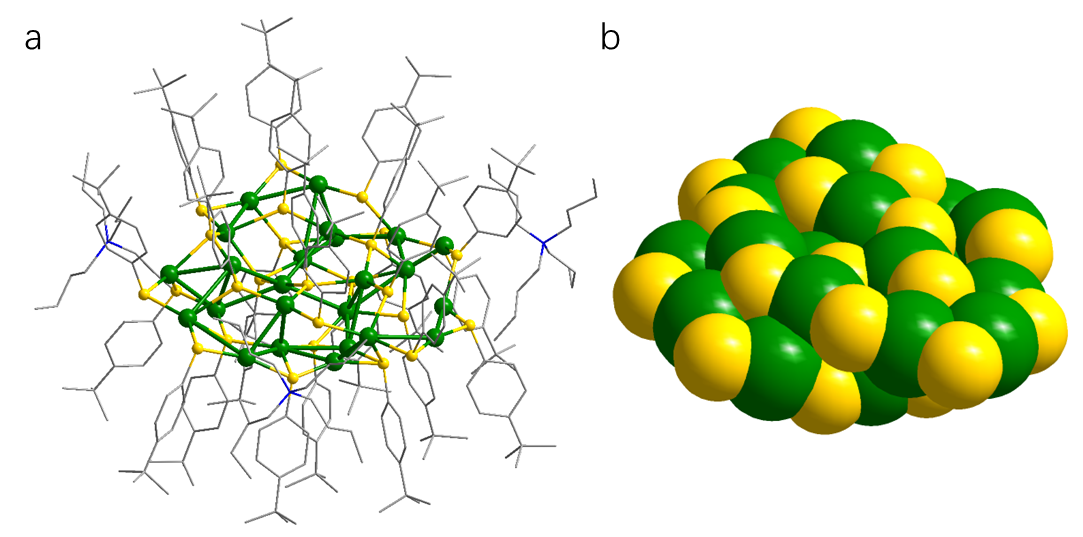


**Fig.S4** The standard and Space-Filling model of the crystal structure of Ag23. Color code: green, Ag; yellow, S; gray, C; blue, N


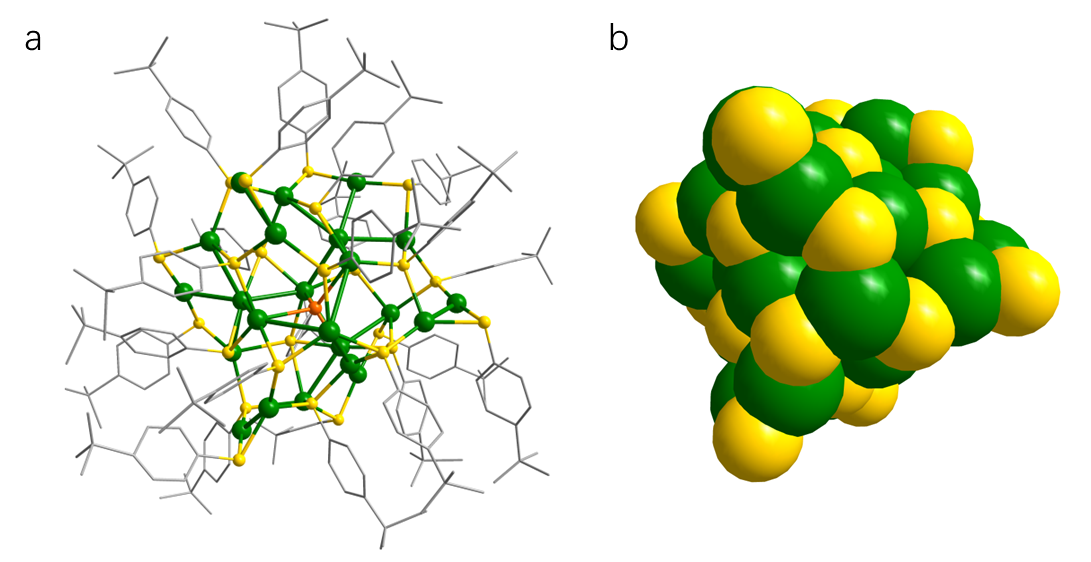


**Fig.S5** The standard and Space-Filling model of the crystal structure of Cl@Ag23. Color code: green, Ag; yellow, S; gray, C; orange, Cl


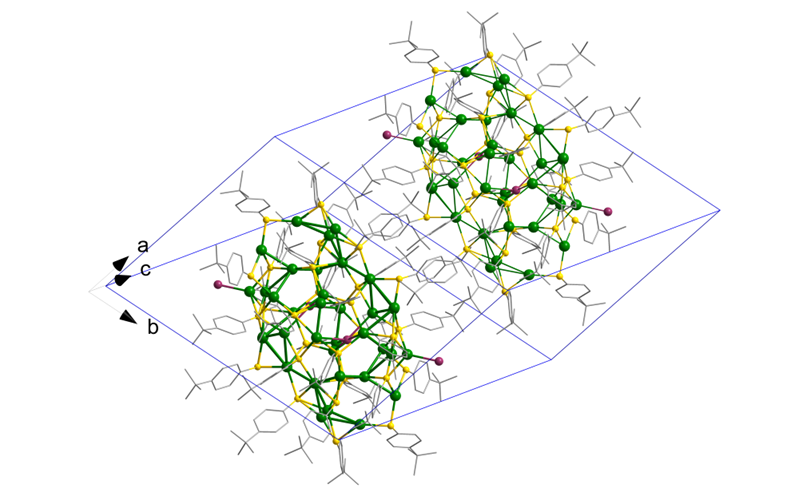


**Fig.S6** The crystal packing diagrams in one unit cell of Br2@Ag28Br2 viewed along.

Color code: green, Ag; yellow, S; gray, C; plum, Br


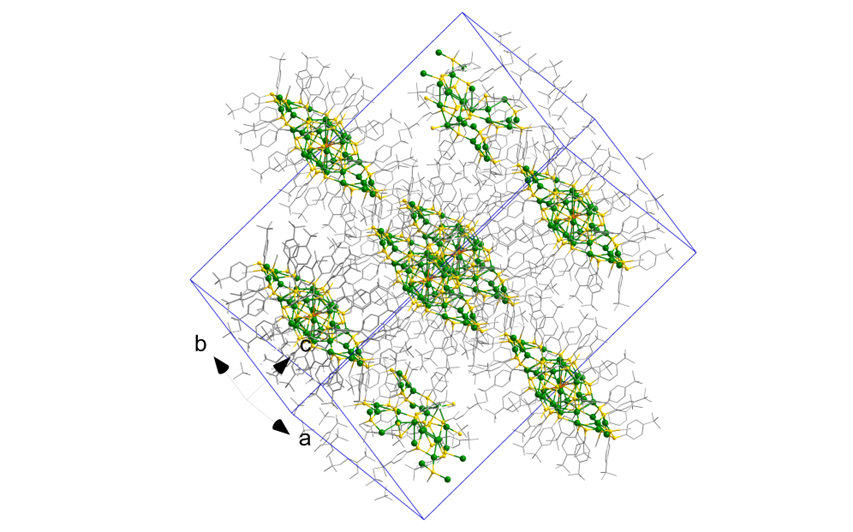


**Fig.S7** The crystal packing diagrams in one unit cell of Cl@Ag36 viewed along.

Color code: green, Ag; yellow, S; gray, C; orange, Cl


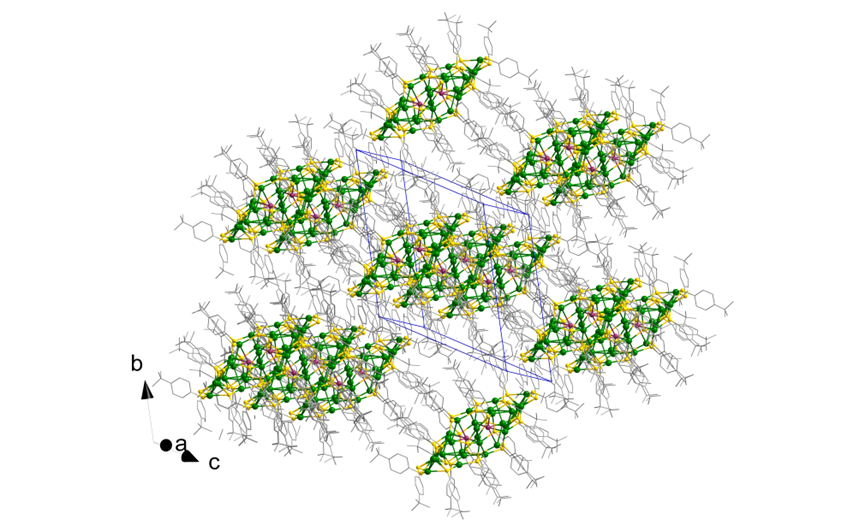


**Fig.S8** The crystal packing diagrams in one unit cell of Br2@Ag28 viewed along.

Color code: green, Ag; yellow, S; gray, C; orange, Br


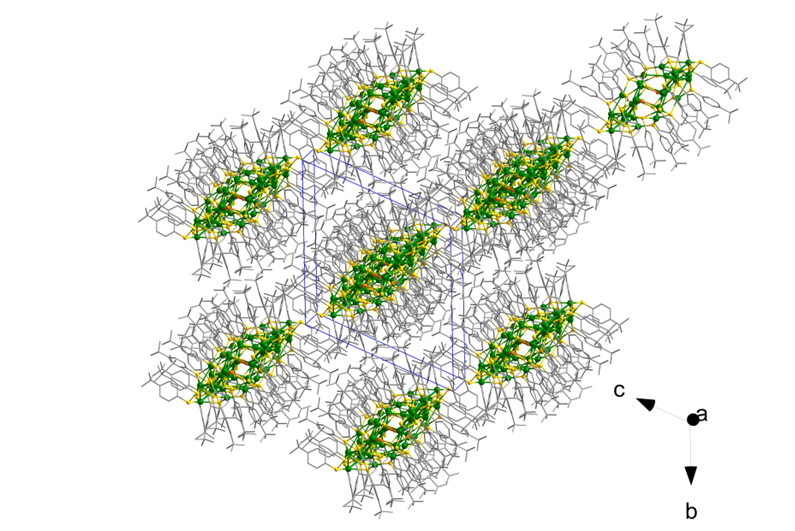


**Fig.S9** The crystal packing diagrams in one unit cell of Cl2@Ag28 viewed along.

Color code: green, Ag; yellow, S; gray, C; orange, Cl


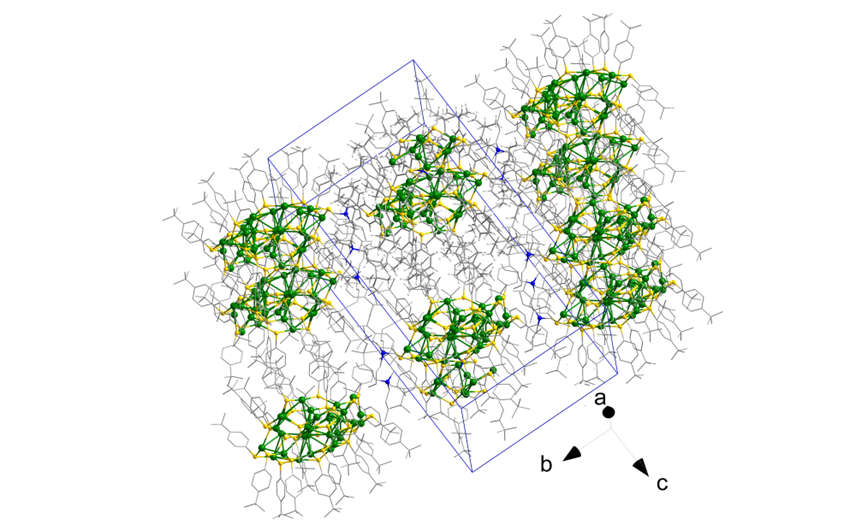


**Fig.S10** The crystal packing diagrams in one unit cell of Ag23 viewed along.

Color code: green, Ag; yellow, S; gray, C; blue, N


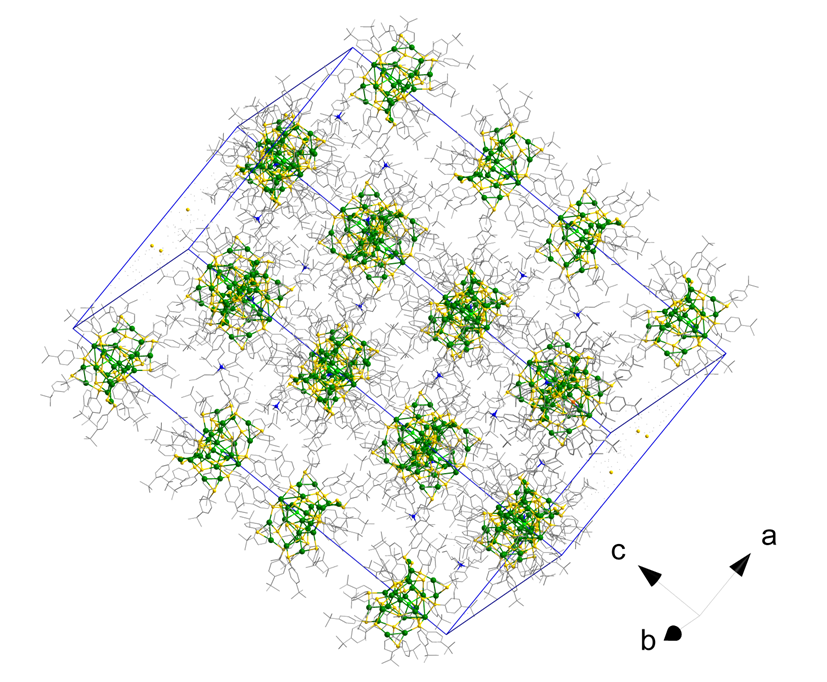


**Fig.S11** The crystal packing diagrams in one unit cell of Cl@Ag2**3** viewed along.

Color code: green, Ag; yellow, S; gray, C; orange, Cl

**Table S1 Crystal data and structure refinement for Br2@Ag28Br2**

| Empirical formula | C280H364Ag27.97Br4S28 |
| --- | --- |
| Formula weight | 7964.67 |
| Temperature/K | 100 |
| Crystal system | triclinic |
| Space group | P-1 |
| a/Å | 19.257(4) |
| b/Å | 22.039(4) |
| c/Å | 22.857(5) |
| α/° | 67.46(3) |
| β/° | 65.12(3) |
| γ/° | 73.63(3) |
| Volume/Å3 | 8044(4) |
| Z | 1 |
| ρcalcg/cm3 | 1.644 |
| μ/mm‑1 | 2.381 |
| F(000) | 3947.0 |
| Crystal size/mm3 | 0.2 × 0.5 × 0.34 |
| Radiation | MoKα (λ = 0.71073) |
| 2Θ range for data collection/° | 6.068 to 54.97 |
| Index ranges | -24 ≤ h ≤ 24,  -28 ≤ k ≤ 23,  -29 ≤ l ≤ 29 |
| Reflections collected | 79618 |
| Independent reflections | 36611 [Rint = 0.0660, Rsigma = 0.0946] |
| Data/restraints/parameters | 36611/39/1614 |
| Goodness-of-fit on F2 | 1.049 |
| Final R indexes [I>=2σ (I)] | R1 = 0.0995,  wR2 = 0.2488 |
| Final R indexes [all data] | R1 = 0.1774,  wR2 = 0.2965 |
| Largest diff. peak/hole / e Å-3 | 2.88/-2.73 |

**Table S2 Crystal data and structure refinement for Cl@Ag36**

| | | Empirical formula | C360H462Ag36ClS36 | | --- | --- | | Formula weight | 9862.20 | | Temperature/K | 100(2) | | Crystal system | trigonal | | Space group | R-3 | | a/Å | 26.447(4) | | b/Å | 26.447(4) | | c/Å | 53.319(11) | | α/° | 90 | | β/° | 90 | | γ/° | 120 | | Volume/Å3 | 32296(11) | | Z | 3 | | ρcalcg/cm3 | 1.521 | | μ/mm‑1 | 1.817 | | F(000) | 14721.0 | | Crystal size/mm3 | 1.2 × 0.5 × 0.5 | | Radiation | MoKα (λ = 0.71073) | | 2Θ range for data collection/° | 6.062 to 29.398 | | Index ranges | -18 ≤ h ≤ 18  -18 ≤ k ≤ 18  -38 ≤ l ≤ 38 | | Reflections collected | 18983 | | Independent reflections | 2722 [Rint = 0.0274, Rsigma = 0.0156] | | Data/restraints/parameters | 2722/26/609 | | Goodness-of-fit on F2 | 1.096 | | Final R indexes [I>=2σ (I)] | R1 = 0.0724  wR2 = 0.2014 | | Final R indexes [all data] | R1 = 0.0740  wR2 = 0.2030 | | Largest diff. peak/hole / e Å-3 | 4.86/-0.88 | | | --- | --- | --- | --- | --- | --- | --- | --- | --- | --- | --- | --- | --- | --- | --- | --- | --- | --- | --- | --- | --- | --- | --- | --- | --- | --- | --- | --- | --- | --- | --- | --- | --- | --- | --- | --- | --- | --- | --- | --- | --- | --- | --- | --- | --- | --- | --- | --- | --- | --- | --- | --- | --- | --- | --- | |
| --- | --- | --- | --- | --- | --- | --- | --- | --- | --- | --- | --- | --- | --- | --- | --- | --- | --- | --- | --- | --- | --- | --- | --- | --- | --- | --- | --- | --- | --- | --- | --- | --- | --- | --- | --- | --- | --- | --- | --- | --- | --- | --- | --- | --- | --- | --- | --- | --- | --- | --- | --- | --- | --- | --- | --- |

**Table S3 Crystal data and structure refinement for Br2@Ag28**

| Empirical formula | C324H434Ag28.02Br2N8S30 |
| --- | --- |
| Formula weight | 8584.90 |
| Temperature/K | 100 |
| Crystal system | triclinic |
| Space group | P-1 |
| a/Å | 21.268(4) |
| b/Å | 22.319(5) |
| c/Å | 23.252(5) |
| α/° | 112.20(3) |
| β/° | 111.52(3) |
| γ/° | 98.54(3) |
| Volume/Å3 | 8963(4) |
| Z | 1 |
| ρcalcg/cm3 | 1.590 |
| μ/mm‑1 | 1.936 |
| F(000) | 4301.0 |
| Crystal size/mm3 | 0.1 × 0.4 × 0.3 |
| Radiation | MoKα (λ = 0.71073) |
| 2Θ range for data collection/° | 6.026 to 54.968 |
| Index ranges | -27 ≤ h ≤ 26,  -28 ≤ k ≤ 27,  -29 ≤ l ≤ 30 |
| Reflections collected | 87740 |
| Independent reflections | 40756 [Rint = 0.0930, Rsigma = 0.1309] |
| Data/restraints/parameters | 40756/6/1827 |
| Goodness-of-fit on F2 | 1.021 |
| Final R indexes [I>=2σ (I)] | R1 = 0.0826  wR2 = 0.1745 |
| Final R indexes [all data] | R1 = 0.1988  wR2 = 0.2940 |
| Largest diff. peak/hole / e Å-3 | 12.80/-1.76 |

**Table S4 Crystal data and structure refinement for Cl2@Ag28**

| Empirical formula | C324H434Ag28.02Cl2N8S30 |
| --- | --- |
| Formula weight | 8495.55 |
| Temperature/K | 100 |
| Crystal system | triclinic |
| Space group | P-1 |
| a/Å | 21.268(4) |
| b/Å | 22.319(5) |
| c/Å | 23.252(5) |
| α/° | 112.20(3) |
| β/° | 111.52(3) |
| γ/° | 98.54(3) |
| Volume/Å3 | 8963(4) |
| Z | 1 |
| ρcalcg/cm3 | 1.574 |
| μ/mm‑1 | 1.727 |
| F(000) | 4265.0 |
| Crystal size/mm3 | 0.25 × 0.3 × 0.45 |
| Radiation | MoKα (λ = 0.71073) |
| 2Θ range for data collection/° | 6.026 to 54.968 |
| Index ranges | -27 ≤ h ≤ 26,  -28 ≤ k ≤ 27,  -29 ≤ l ≤ 30 |
| Reflections collected | 87740 |
| Independent reflections | 40756 [Rint = 0.0930, Rsigma = 0.1309] |
| Data/restraints/parameters | 40756/6/1827 |
| Goodness-of-fit on F2 | 1.032 |
| Final R indexes [I>=2σ (I)] | R1 = 0.1169,  wR2 = 0.2963 |
| Final R indexes [all data] | R1 = 0.1976,  wR2 = 0.3542 |
| Largest diff. peak/hole / e Å-3 | 13.38/-1.75 |

| **Table S5 Crystal data and structure refinement for Ag23** | |
| --- | --- |
| Empirical formula | C306H436Ag23.19N3S26 |
| Formula weight | 7491.19 |
| Temperature/K | 100 |
| Crystal system | triclinic |
| Space group | P-1 |
| a/Å | 21.614(4) |
| b/Å | 22.646(5) |
| c/Å | 39.253(8) |
| α/° | 97.91(3) |
| β/° | 95.41(3) |
| γ/° | 117.88(3) |
| Volume/Å3 | 16542(7) |
| Z | 2 |
| ρcalcg/cm3 | 1.504 |
| μ/mm‑1 | 1.548 |
| F(000) | 7597.0 |
| Crystal size/mm3 | 0.3 × 0.4 × 0.4 |
| Radiation | MoKα (λ = 0.71073) |
| 2Θ range for data collection/° | 6.006 to 54.97 |
| Index ranges | -28 ≤ h ≤ 28,  -27 ≤ k ≤ 29,  -50 ≤ l ≤ 50 |
| Reflections collected | 152185 |
| Independent reflections | 71718 [Rint = 0.0932, Rsigma = 0.1226] |
| Data/restraints/parameters | 71718/28/3374 |
| Goodness-of-fit on F2 | 1.033 |
| Final R indexes [I>=2σ (I)] | R1 = 0.0816,  wR2 = 0.2289 |
| Final R indexes [all data] | R1 = 0.1207,  wR2 = 0.2633 |
| Largest diff. peak/hole / e Å-3 | 7.11/-2.02 |

| **Table** **S6 Crystal data and structure refinement for Cl@Ag23** | |
| --- | --- |
| Empirical formula | C264H357Ag23ClN1.5S24 |
| Formula weight | 6837.39 |
| Temperature/K | 100K |
| Crystal system | trigonal |
| Space group | R-3c |
| a/Å | 39.243(6) |
| b/Å | 39.243(6) |
| c/Å | 73.915(15) |
| α/° | 90 |
| β/° | 90 |
| γ/° | 120 |
| Volume/Å3 | 98580(34) |
| Z | 12 |
| ρcalcg/cm3 | 1.382 |
| μ/mm‑1 | 1.536 |
| F(000) | 41202.0 |
| Crystal size/mm3 | 0.4 × 0.5 × 0.2 |
| Radiation | MoKα (λ = 0.71073) |
| 2Θ range for data collection/° | 6.01 to 41.636 |
| Index ranges | -39 ≤ h ≤ 29,  -39 ≤ k ≤ 32,  -73 ≤ l ≤ 73 |
| Reflections collected | 52234 |
| Independent reflections | 11135 [Rint = 0.1040, Rsigma = 0.0910] |
| Data/restraints/parameters | 11135/6/932 |
| Goodness-of-fit on F2 | 1.082 |
| Final R indexes [I>=2σ (I)] | R1 = 0.0702  wR2 = 0.2043 |
| Final R indexes [all data] | R1 = 0.0903  wR2 = 0.2227 |
| Largest diff. peak/hole / e Å-3 | 0.82/-0.74 |
